# Supplementary figures and images for: Reversible ON/OFF switching of photoluminescence from CsPbX3 quantum dots coated with silica using photochromic diarylethene
Source: Royal Society of Chemistry journal article supplement (doi:10.1039/c9cc03797g), 2019-01-01

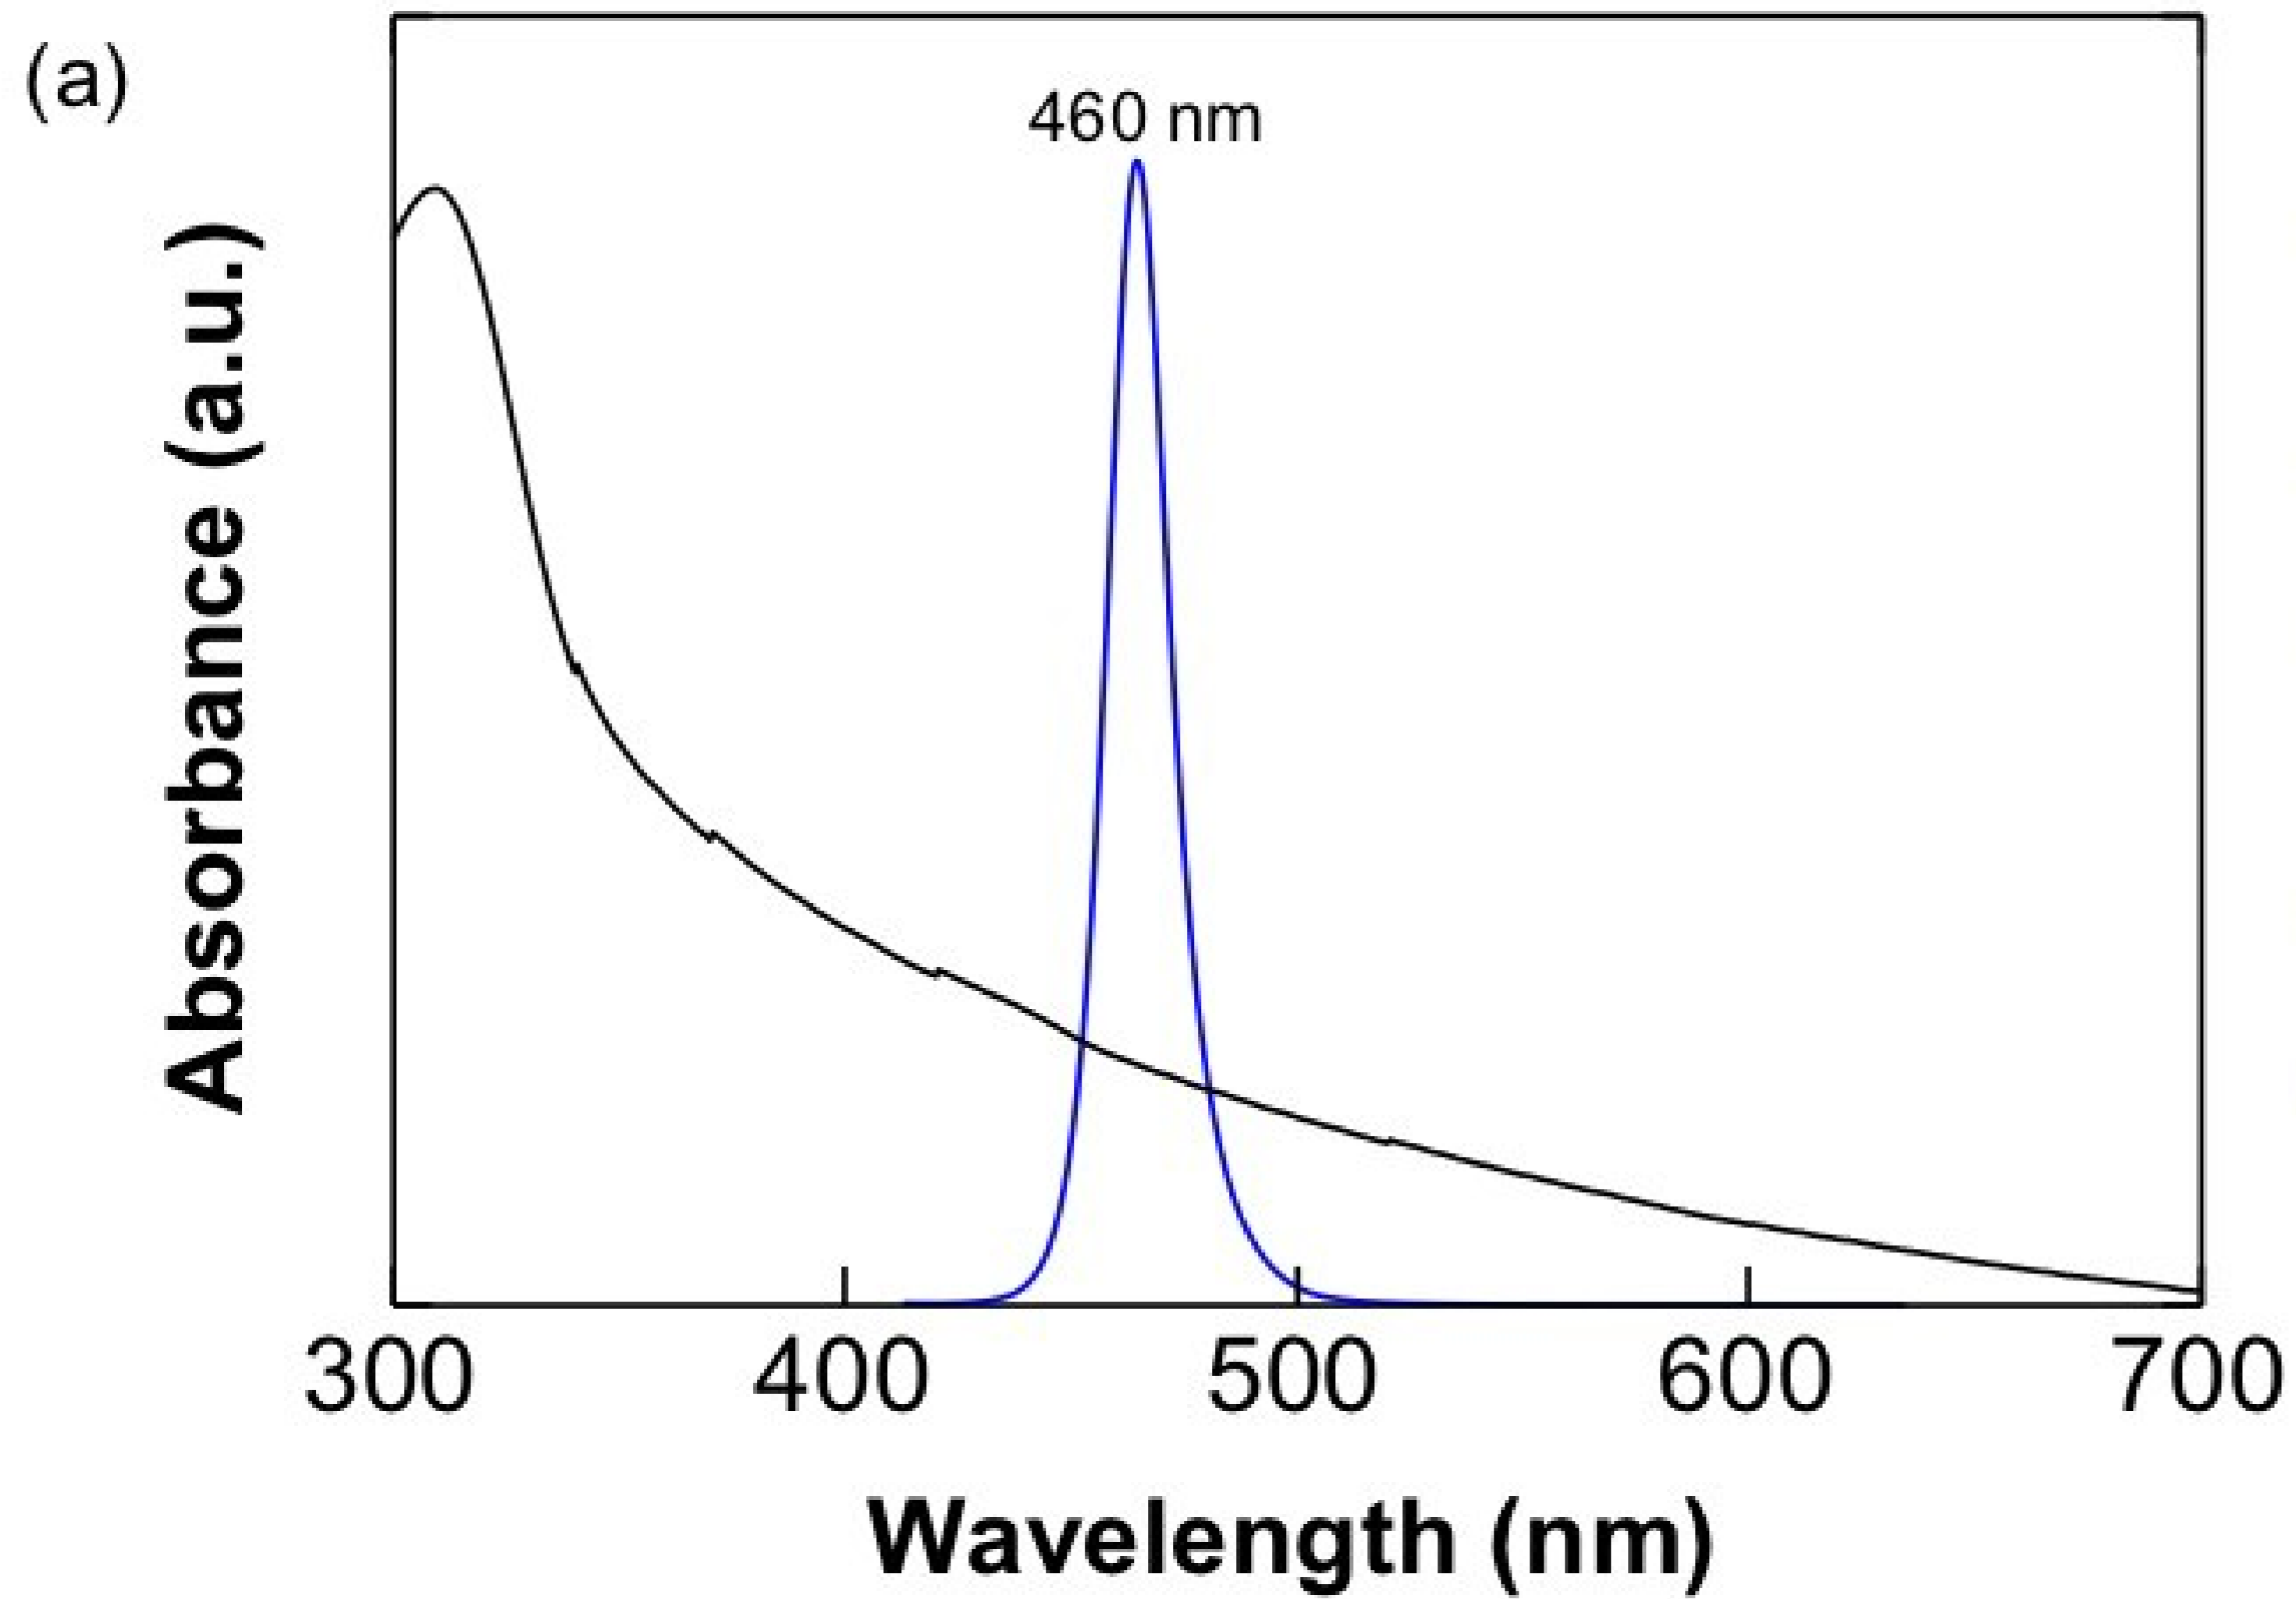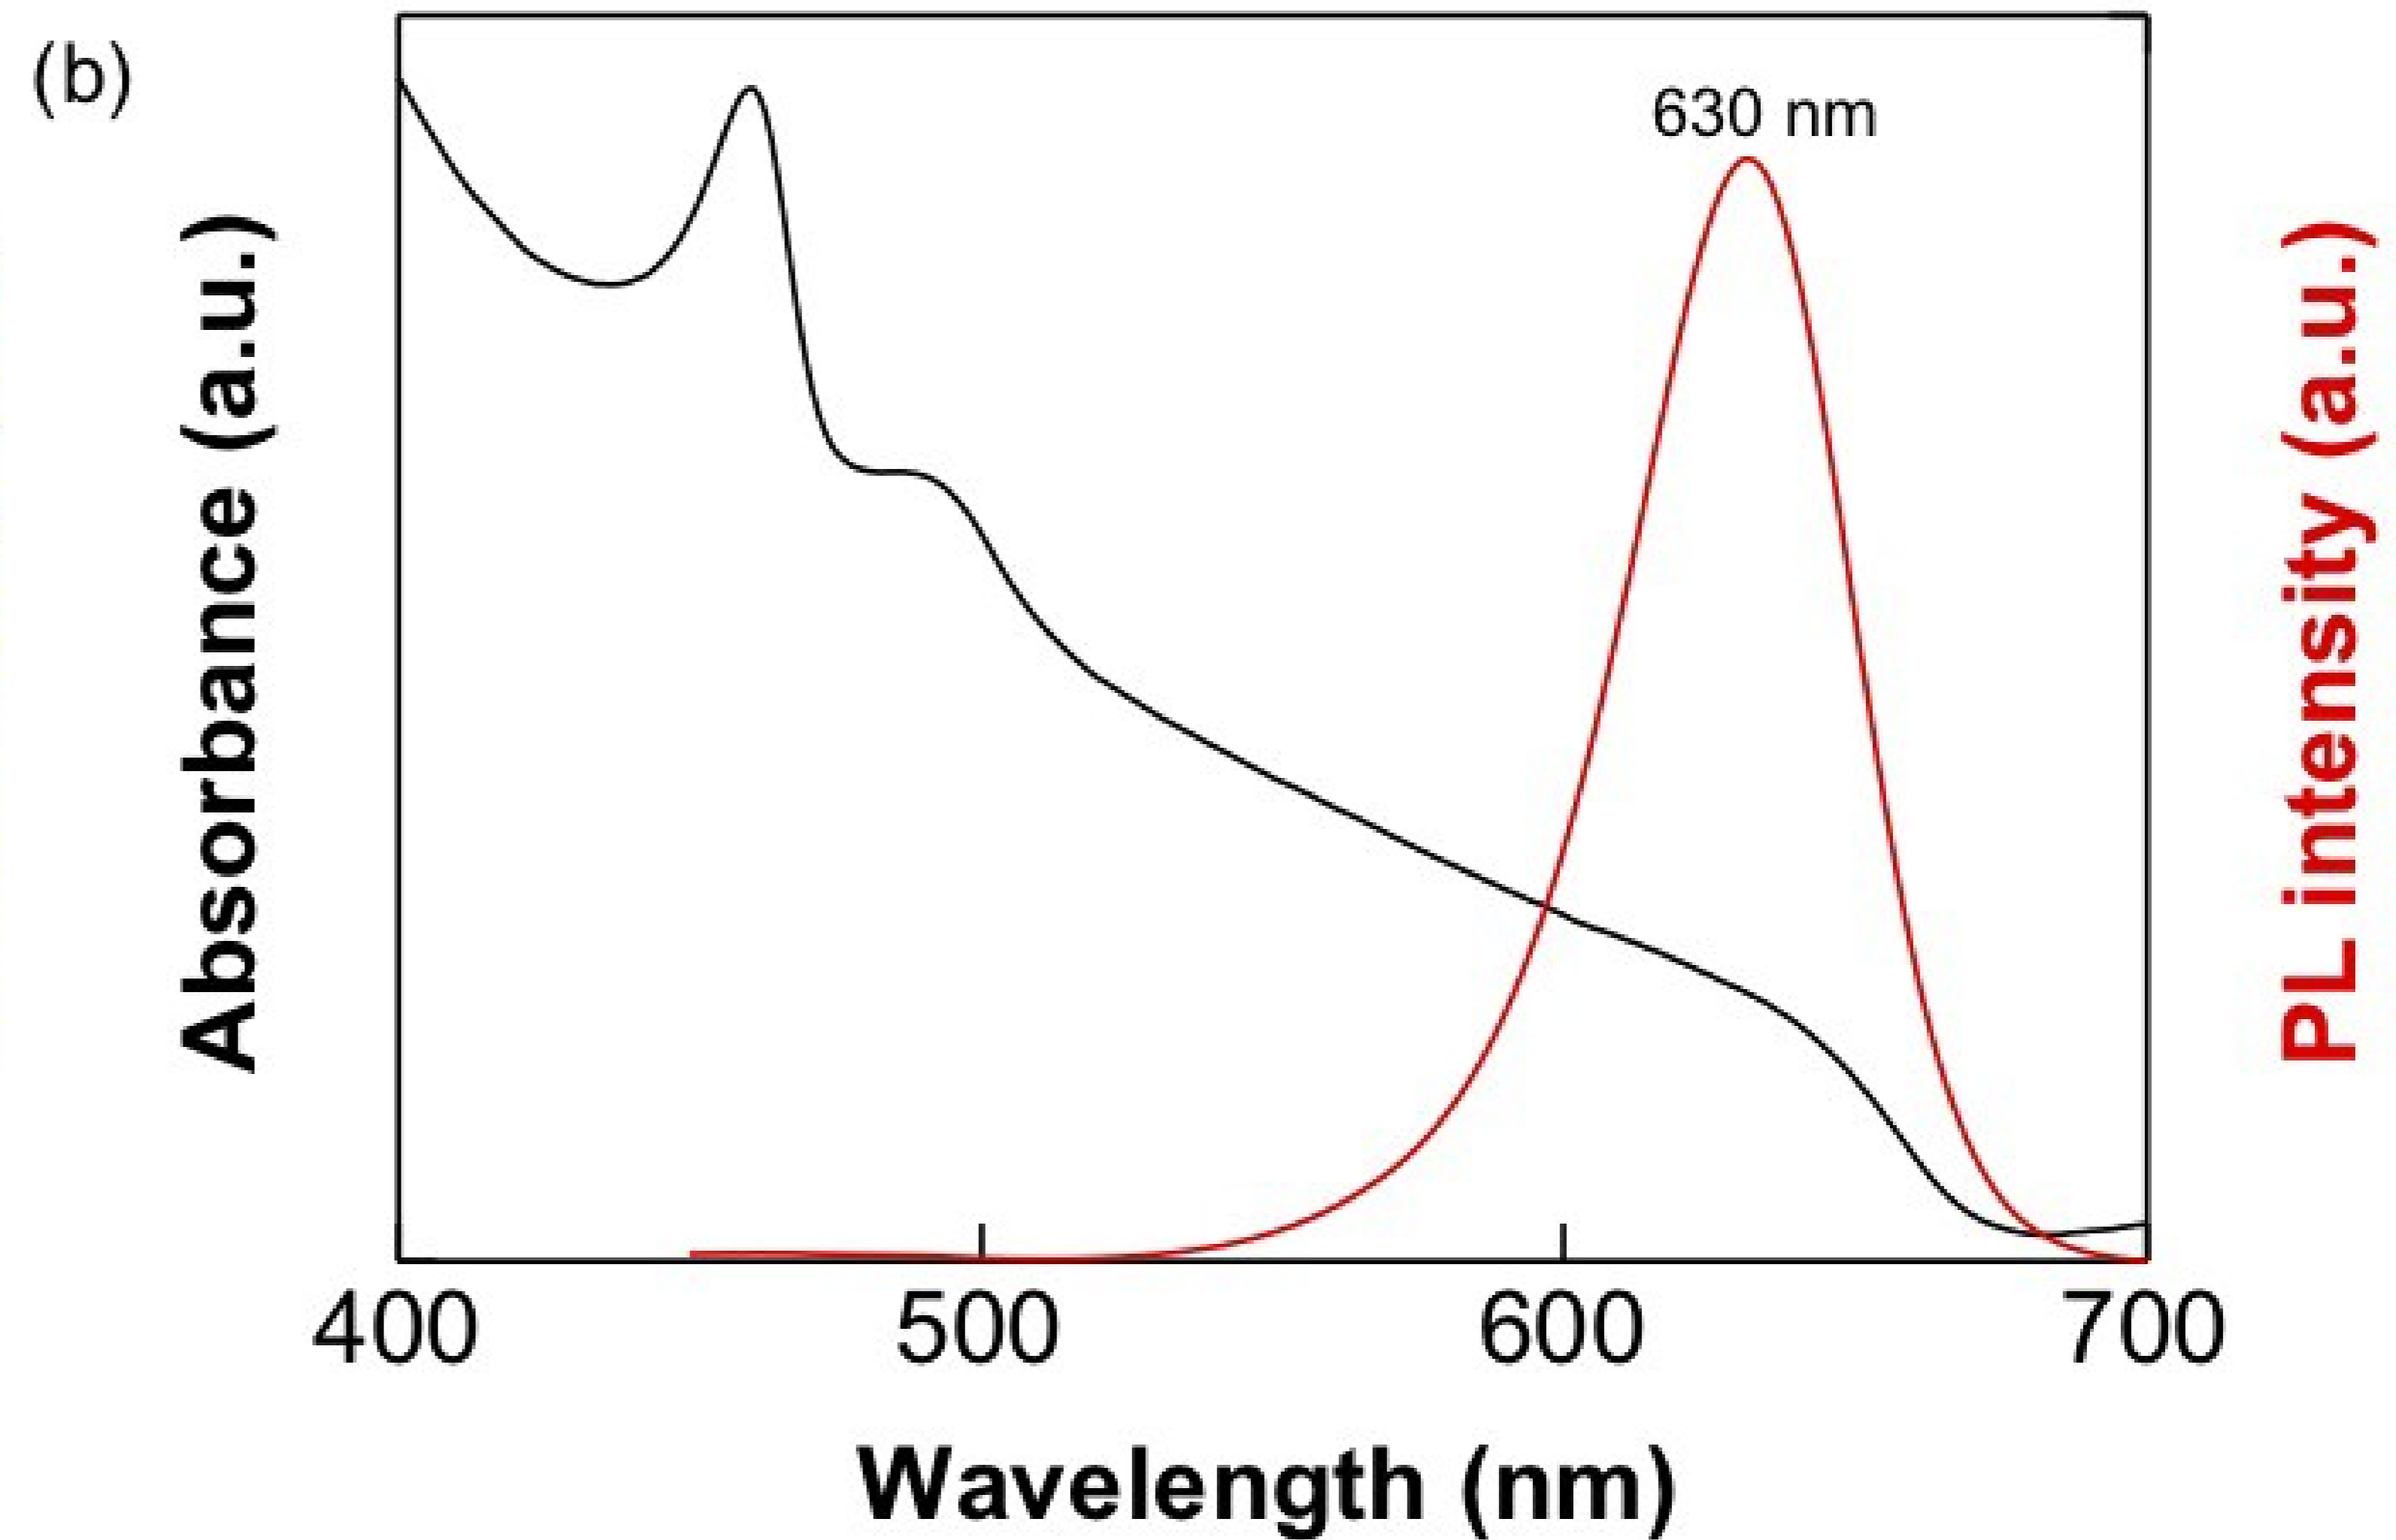

Supplement: c9cc03797g11.pdf [file c9cc03797g11.pdf]

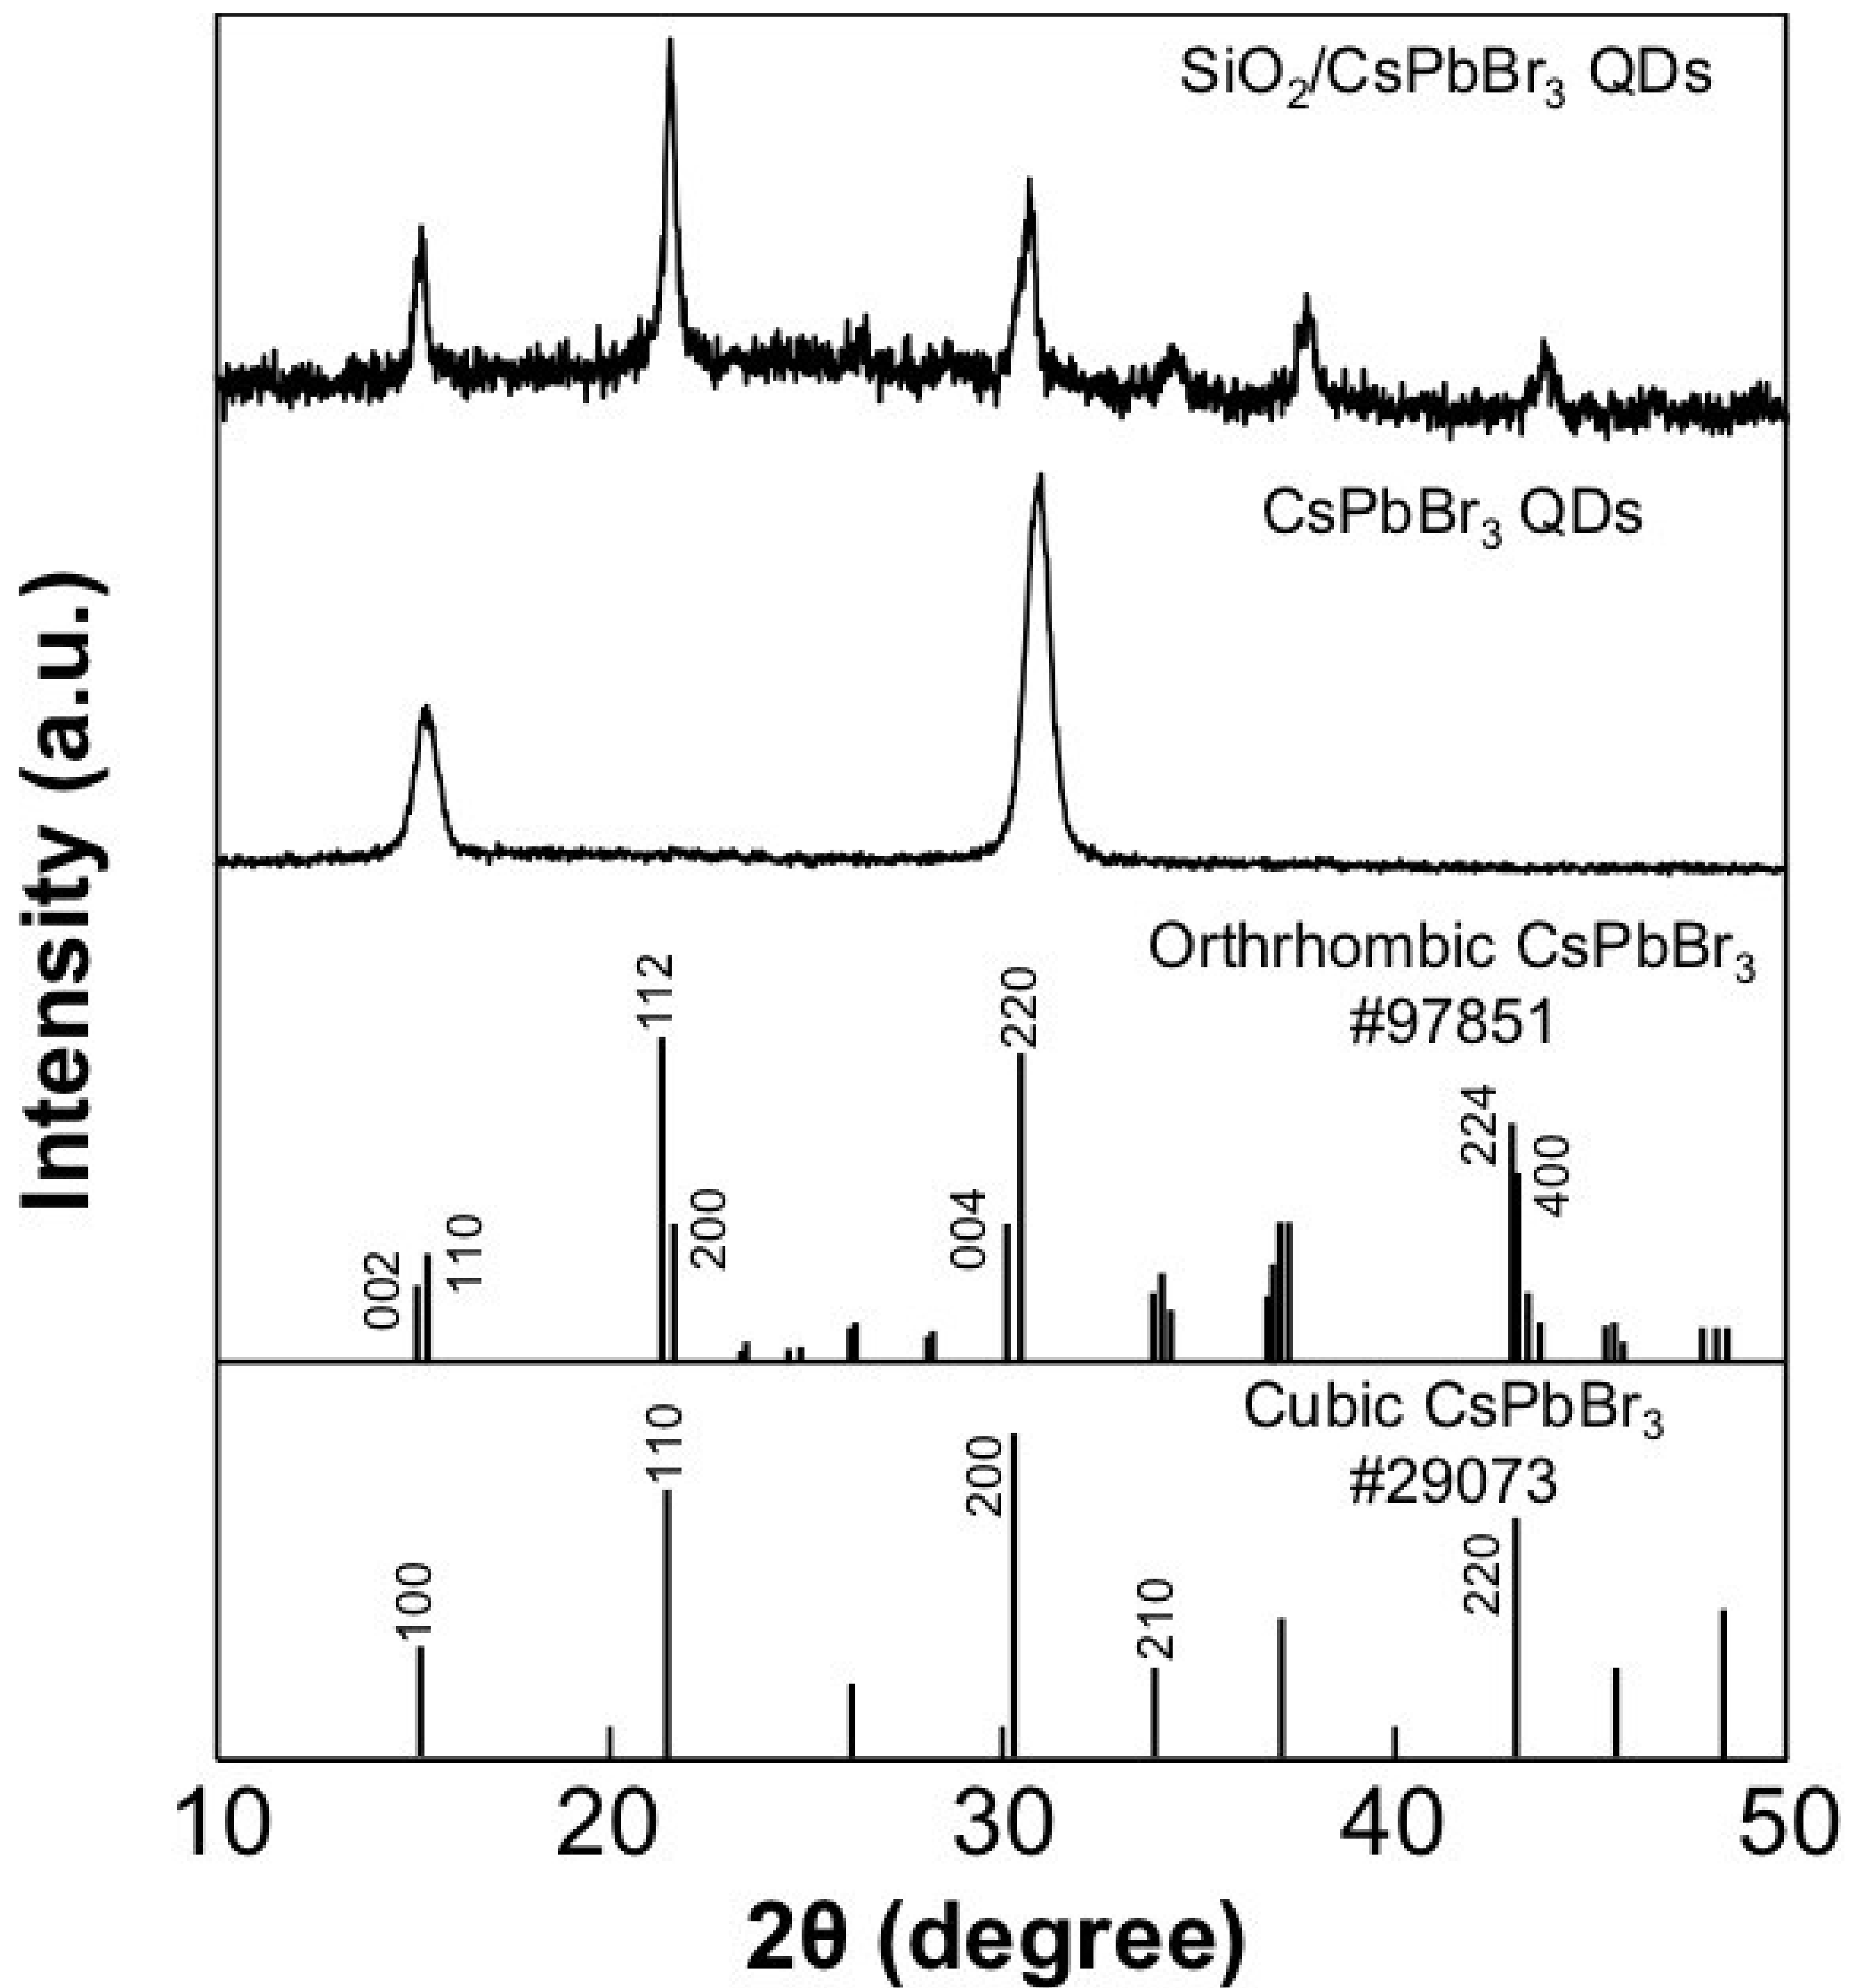

Supplement: c9cc03797g4.pdf [file c9cc03797g4.pdf]

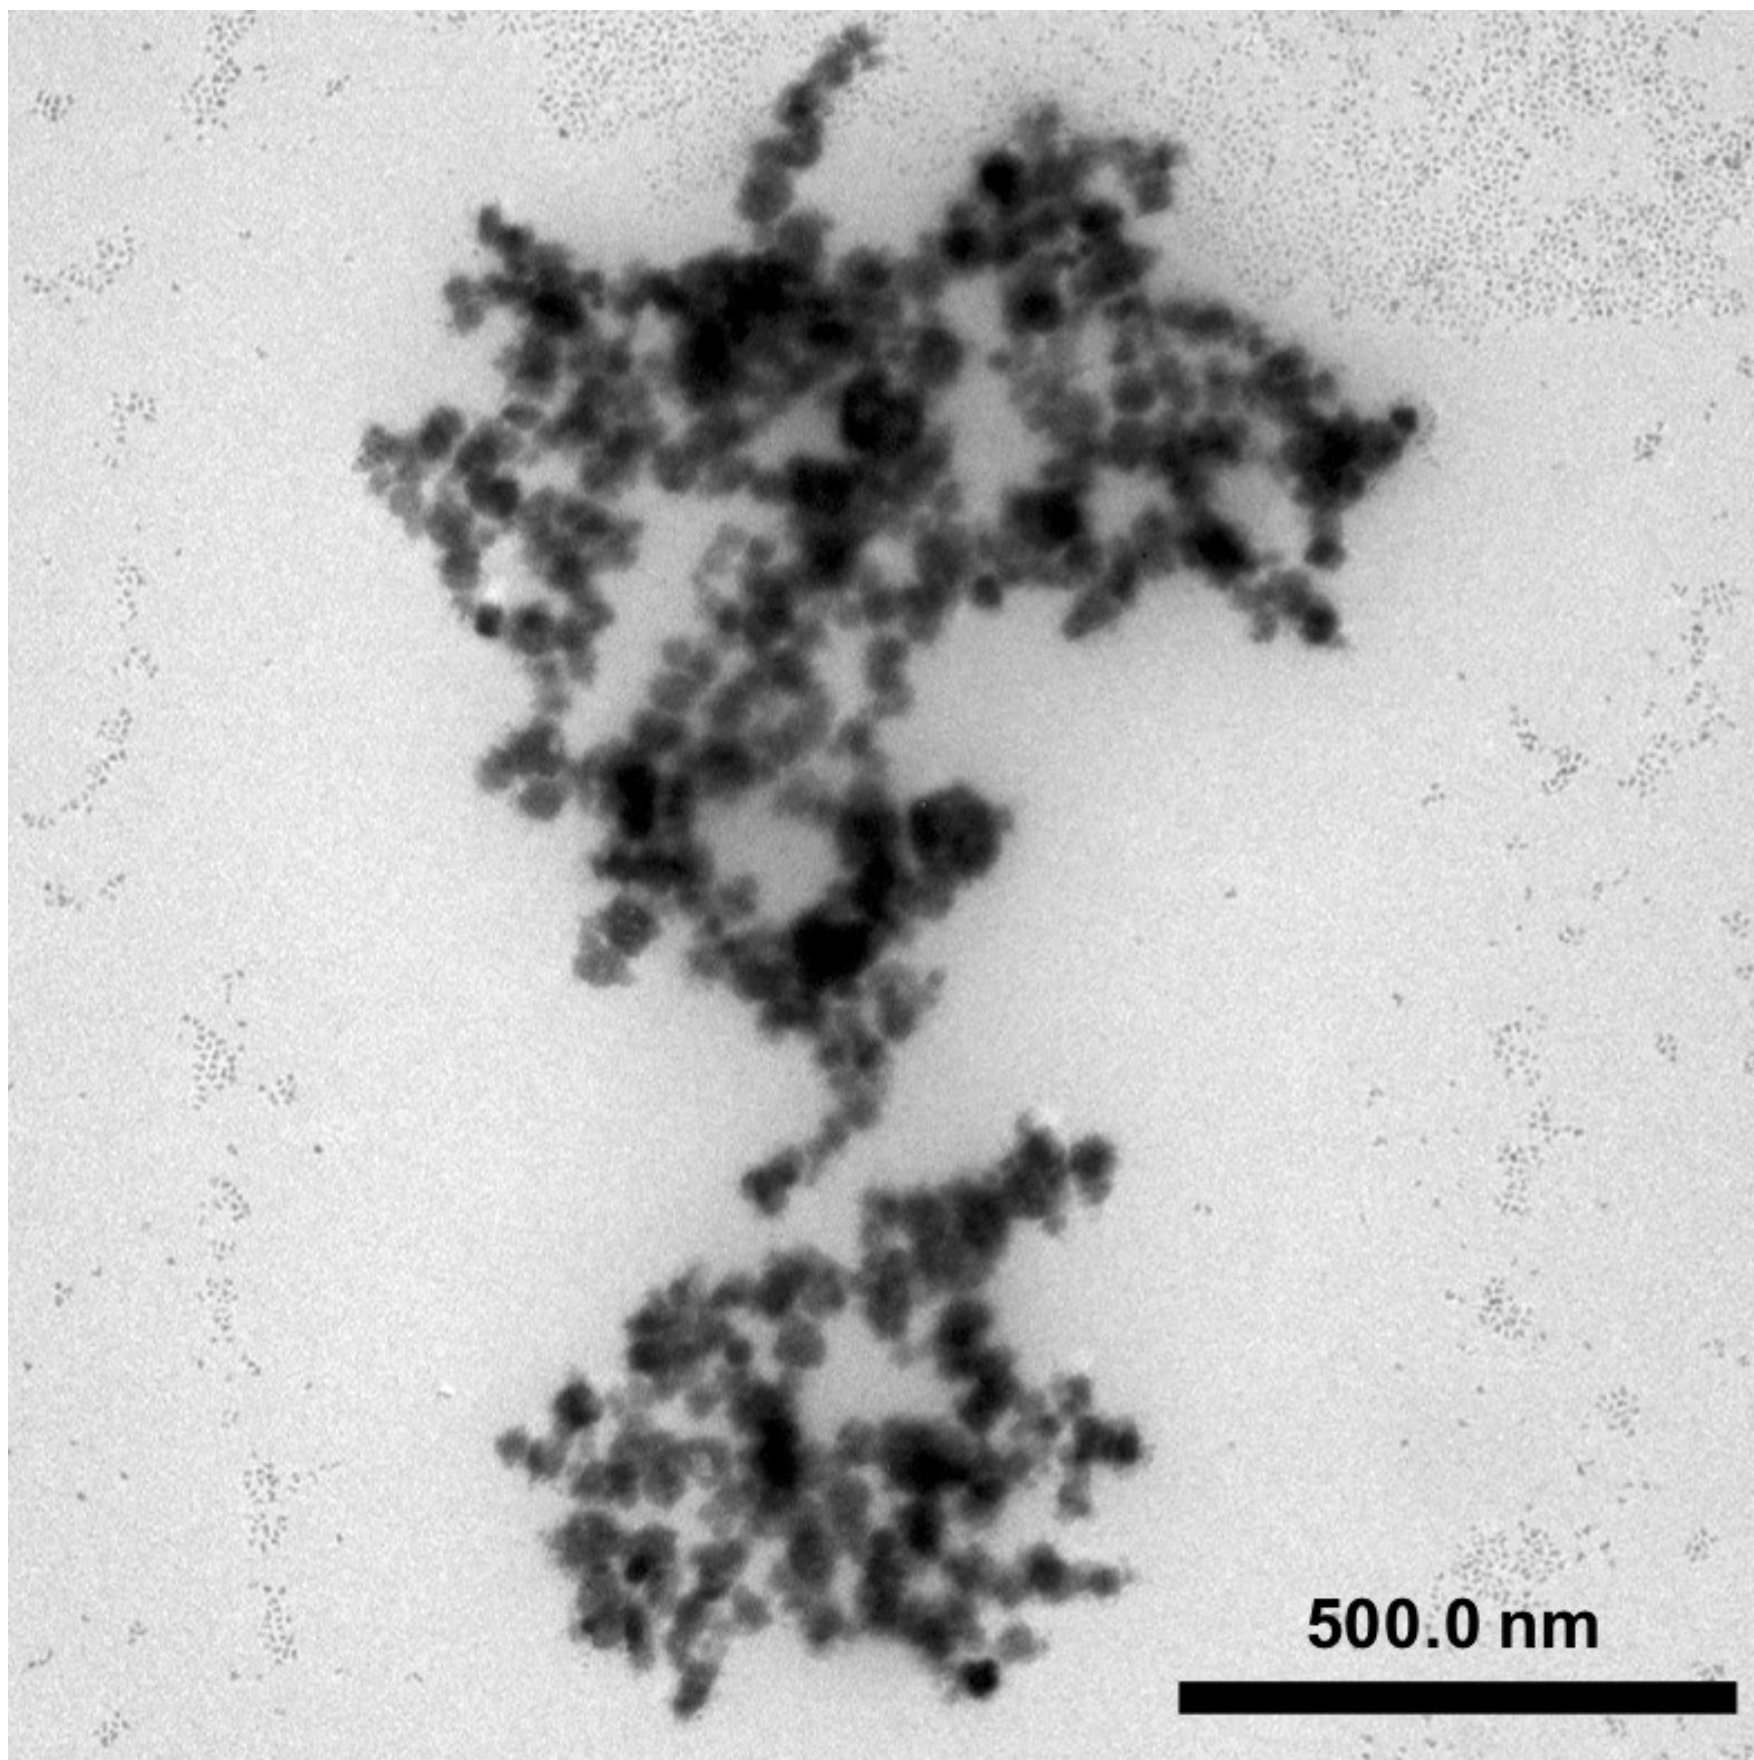

Supplement: c9cc03797g5.pdf [file c9cc03797g5.pdf]

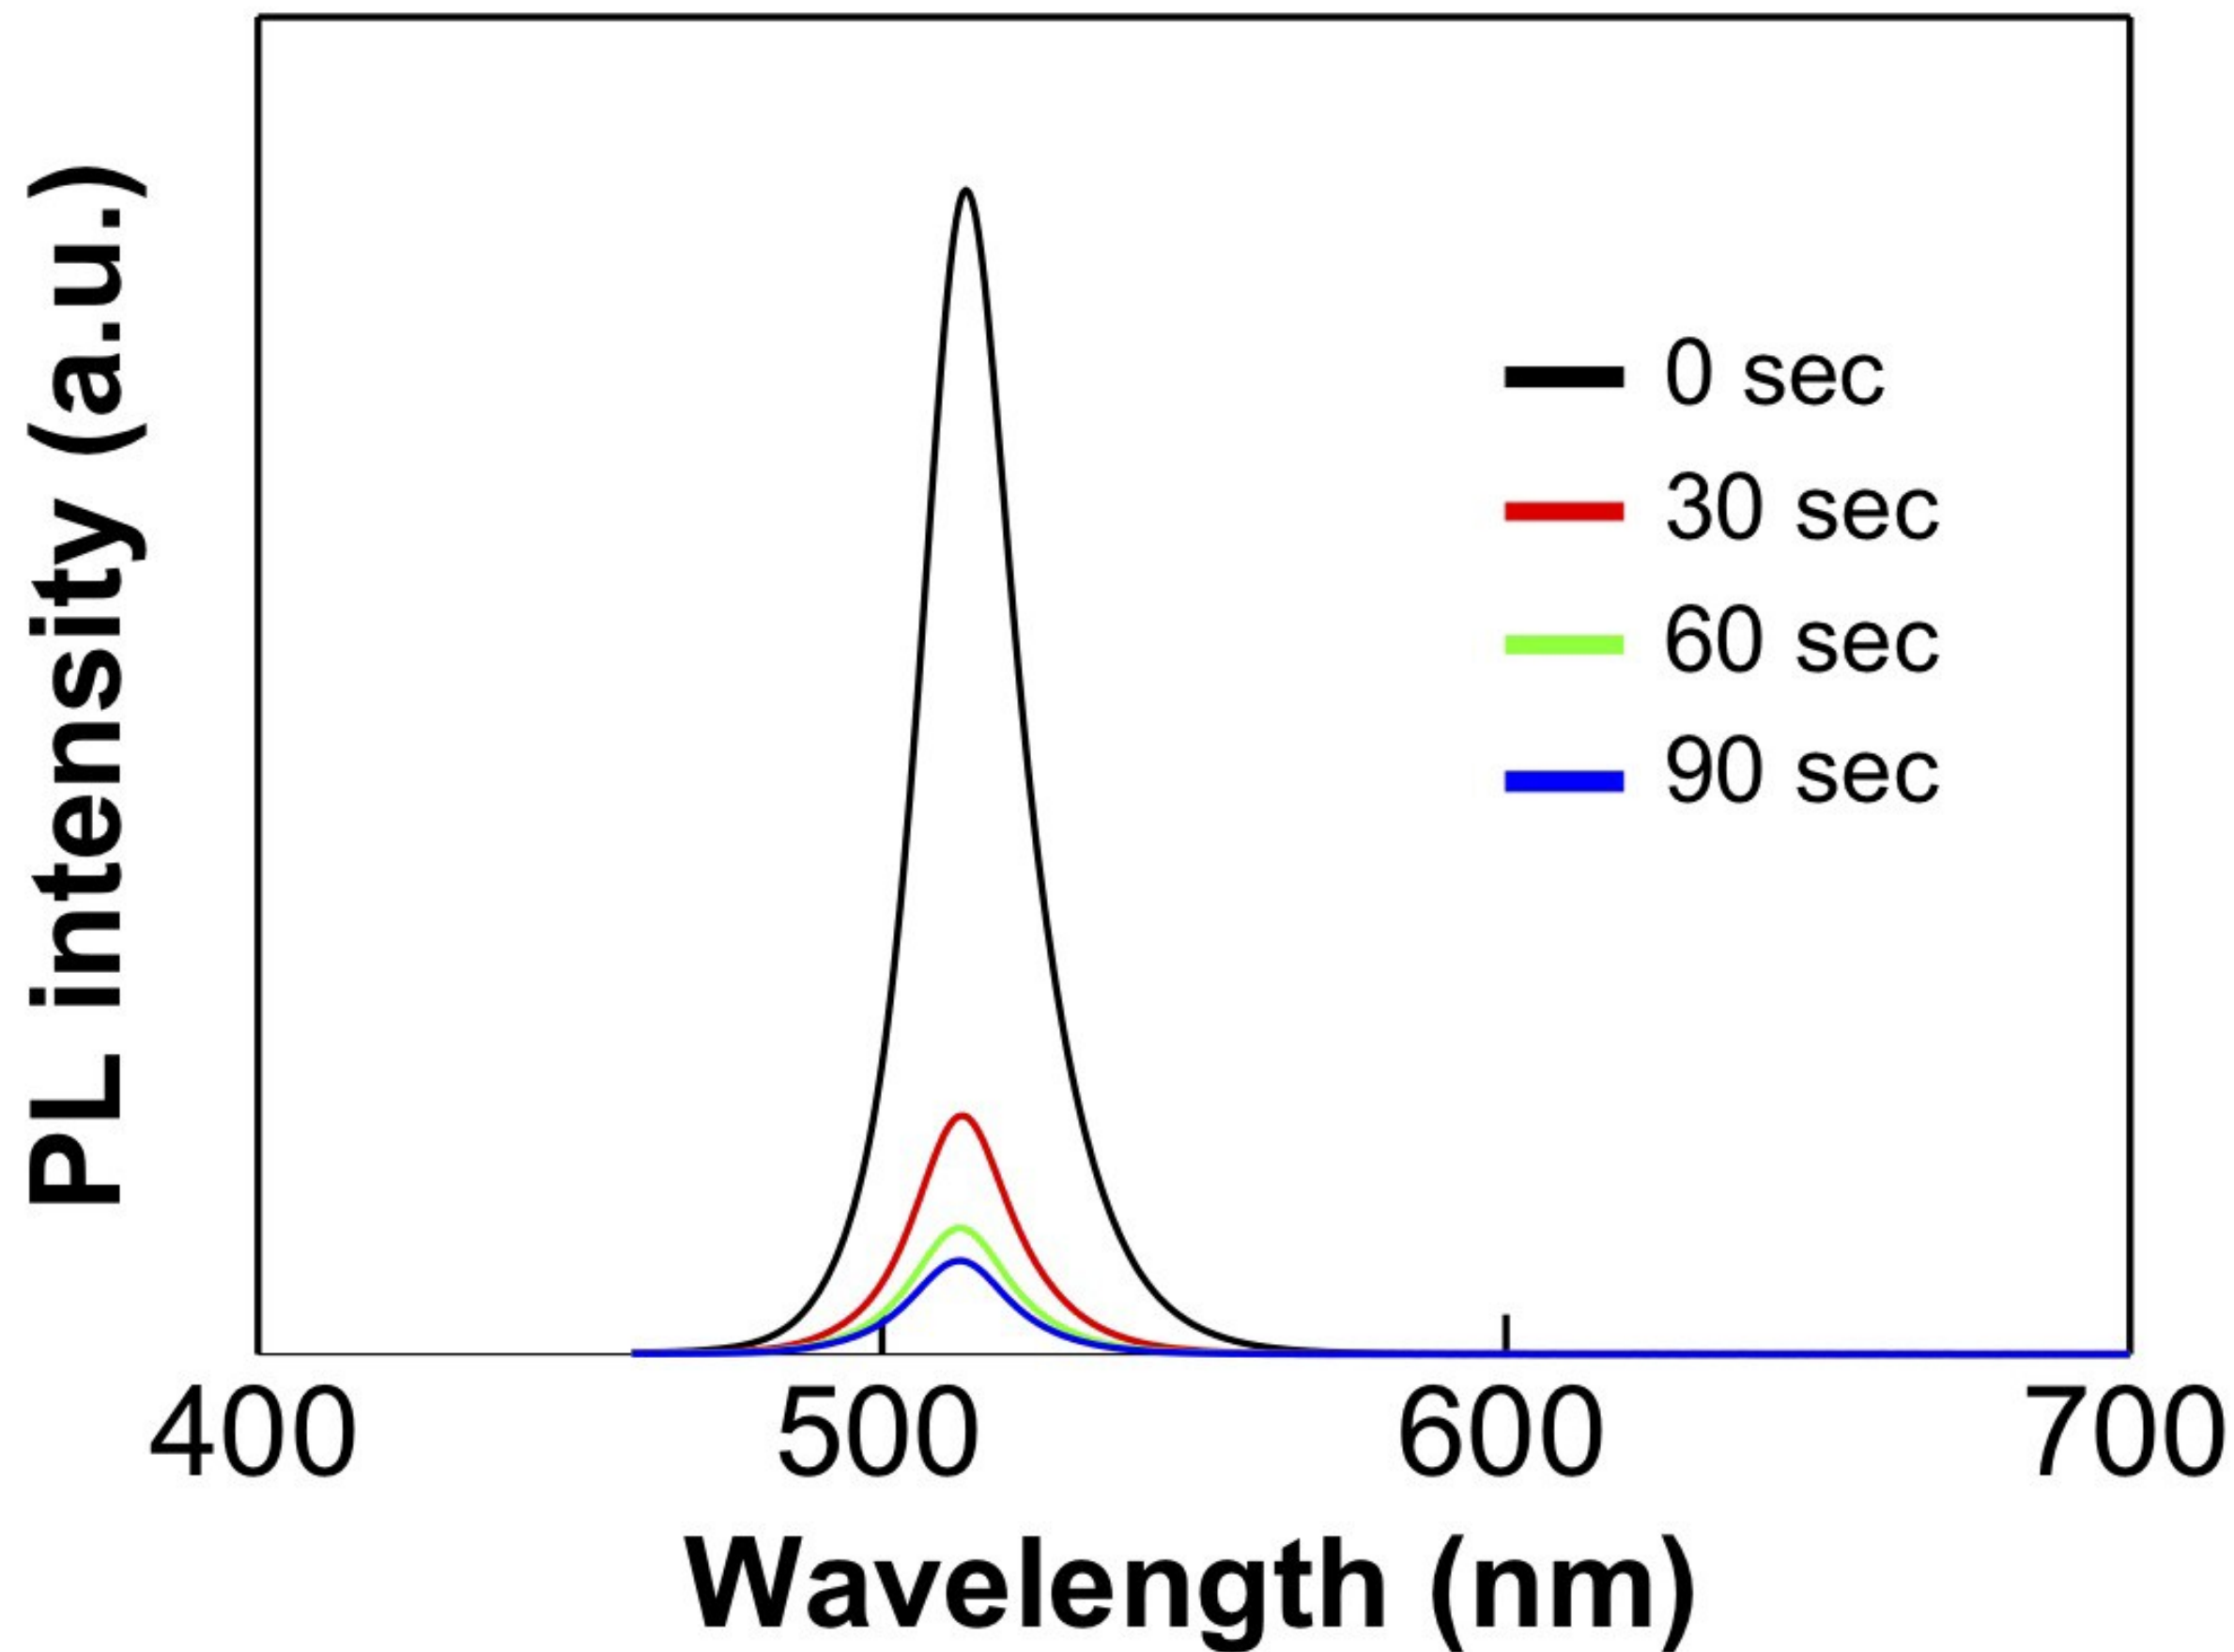

Supplement: c9cc03797g7.pdf [file c9cc03797g7.pdf]

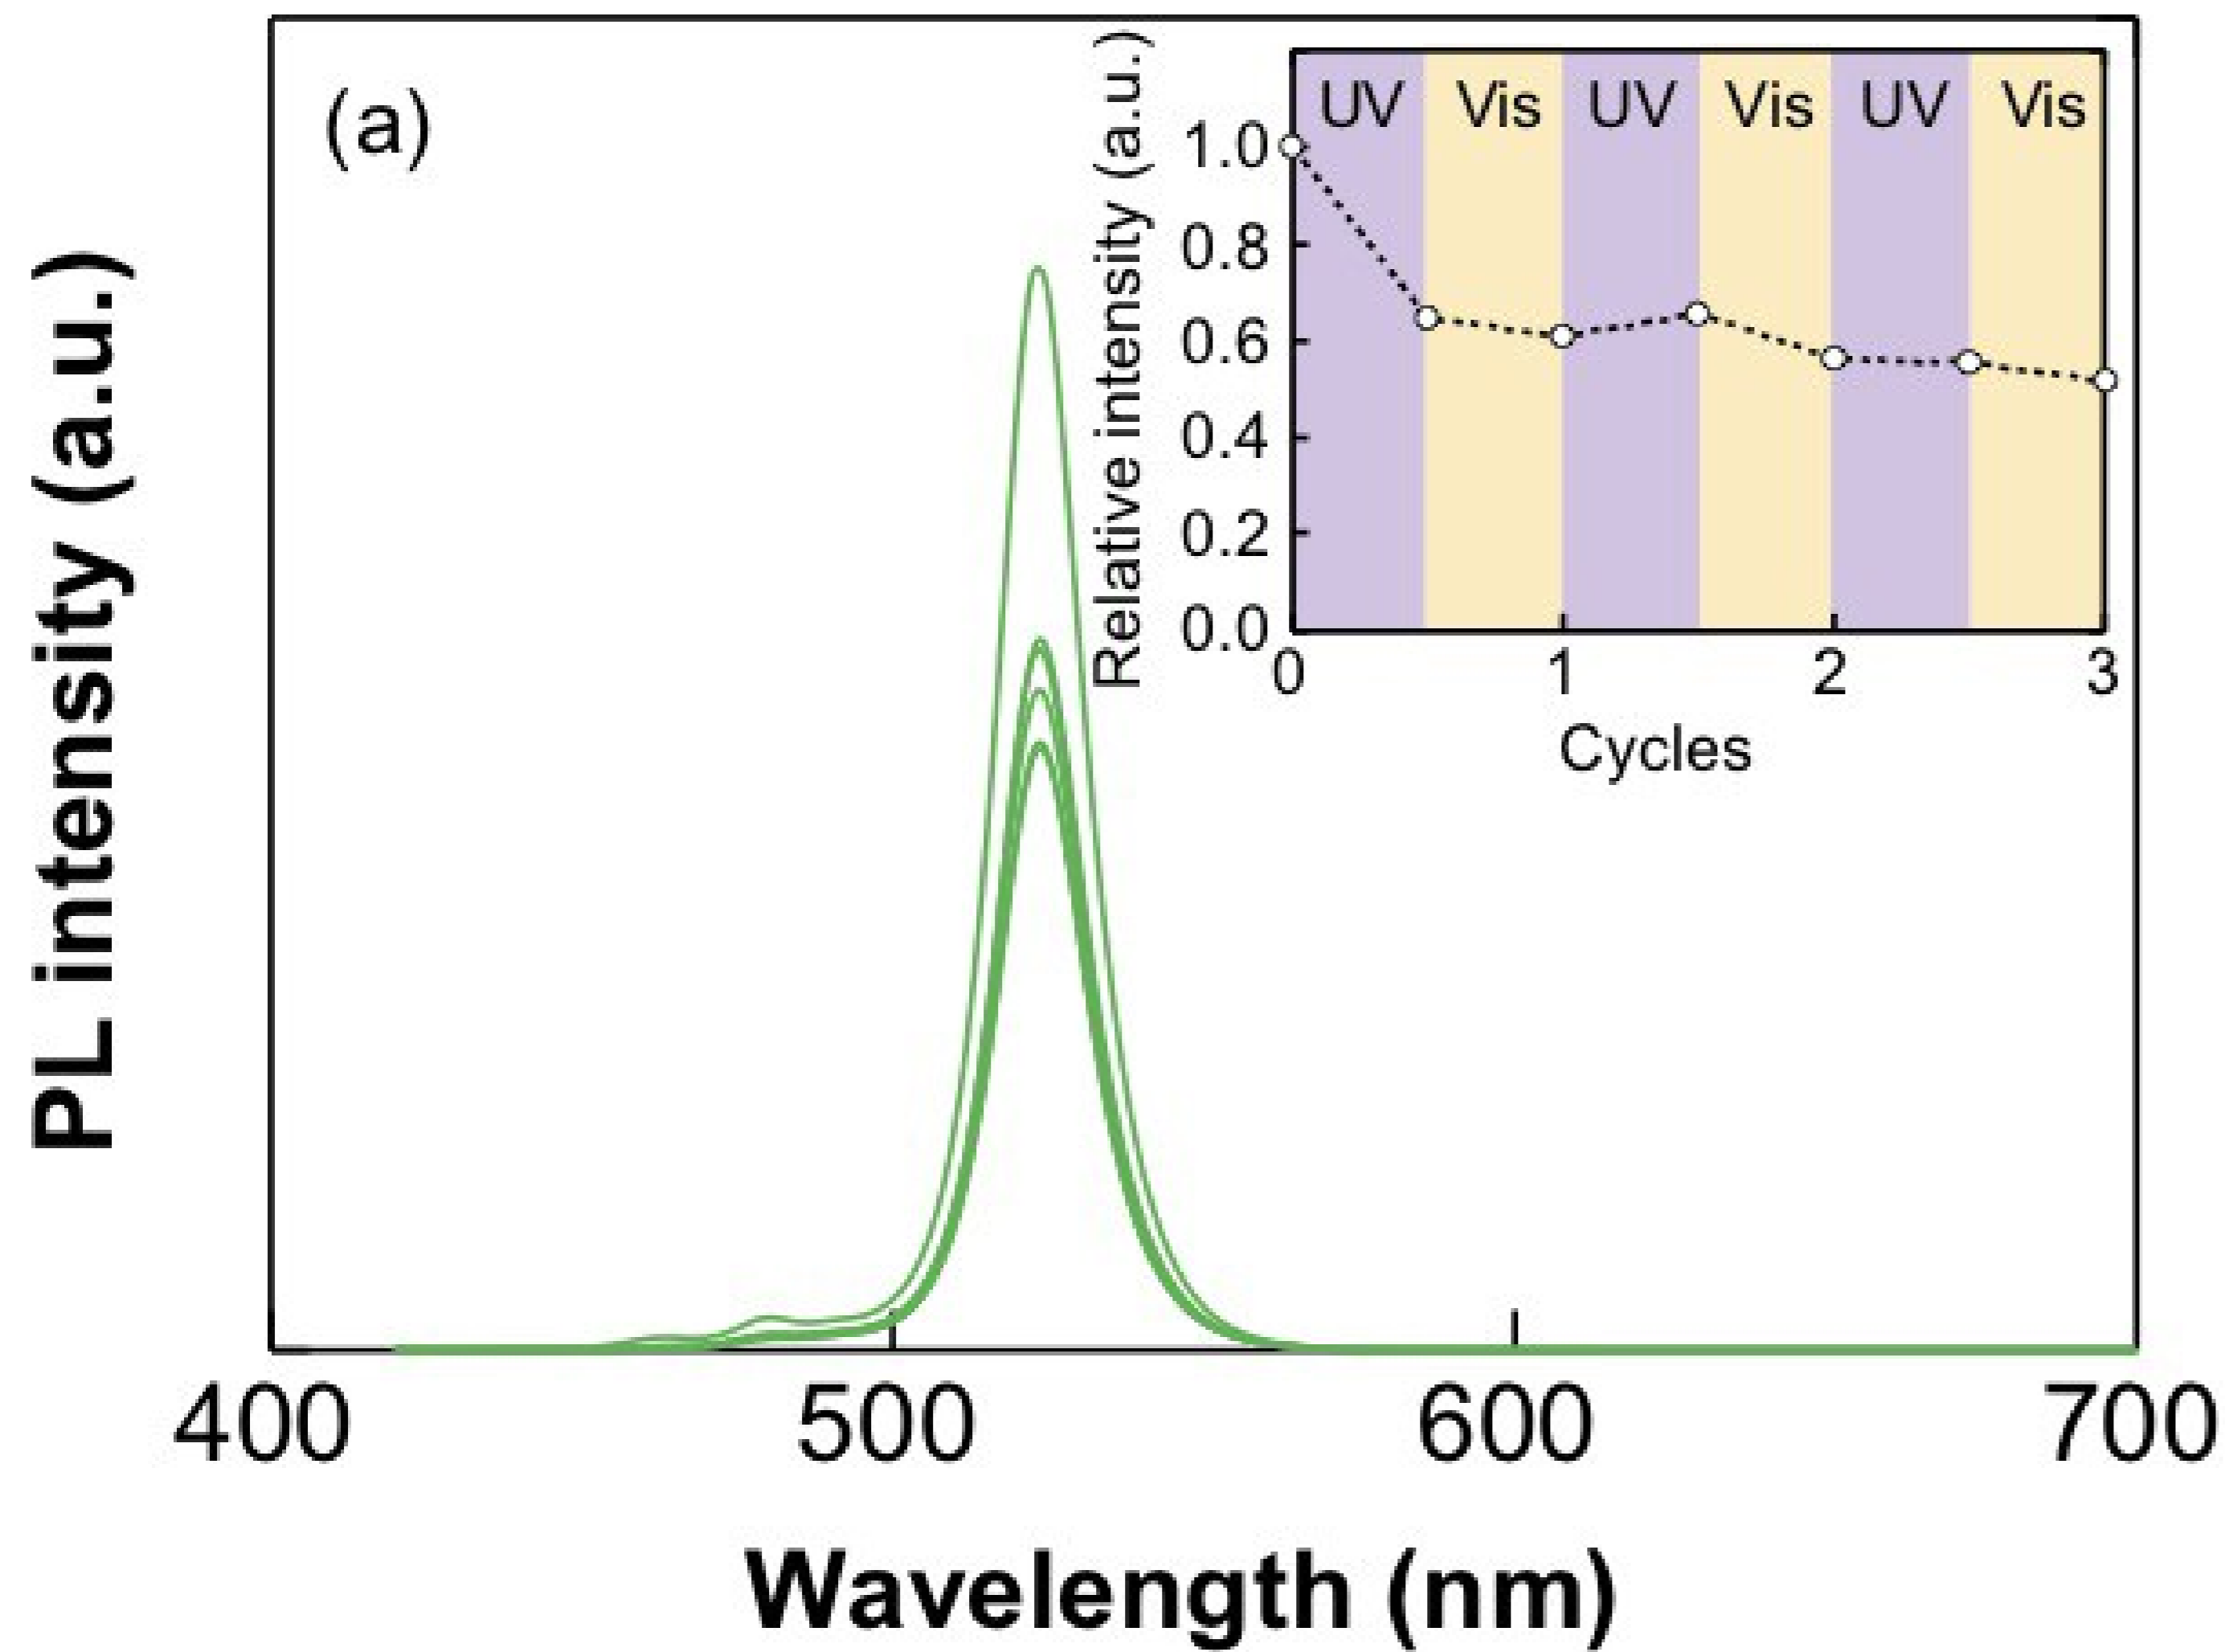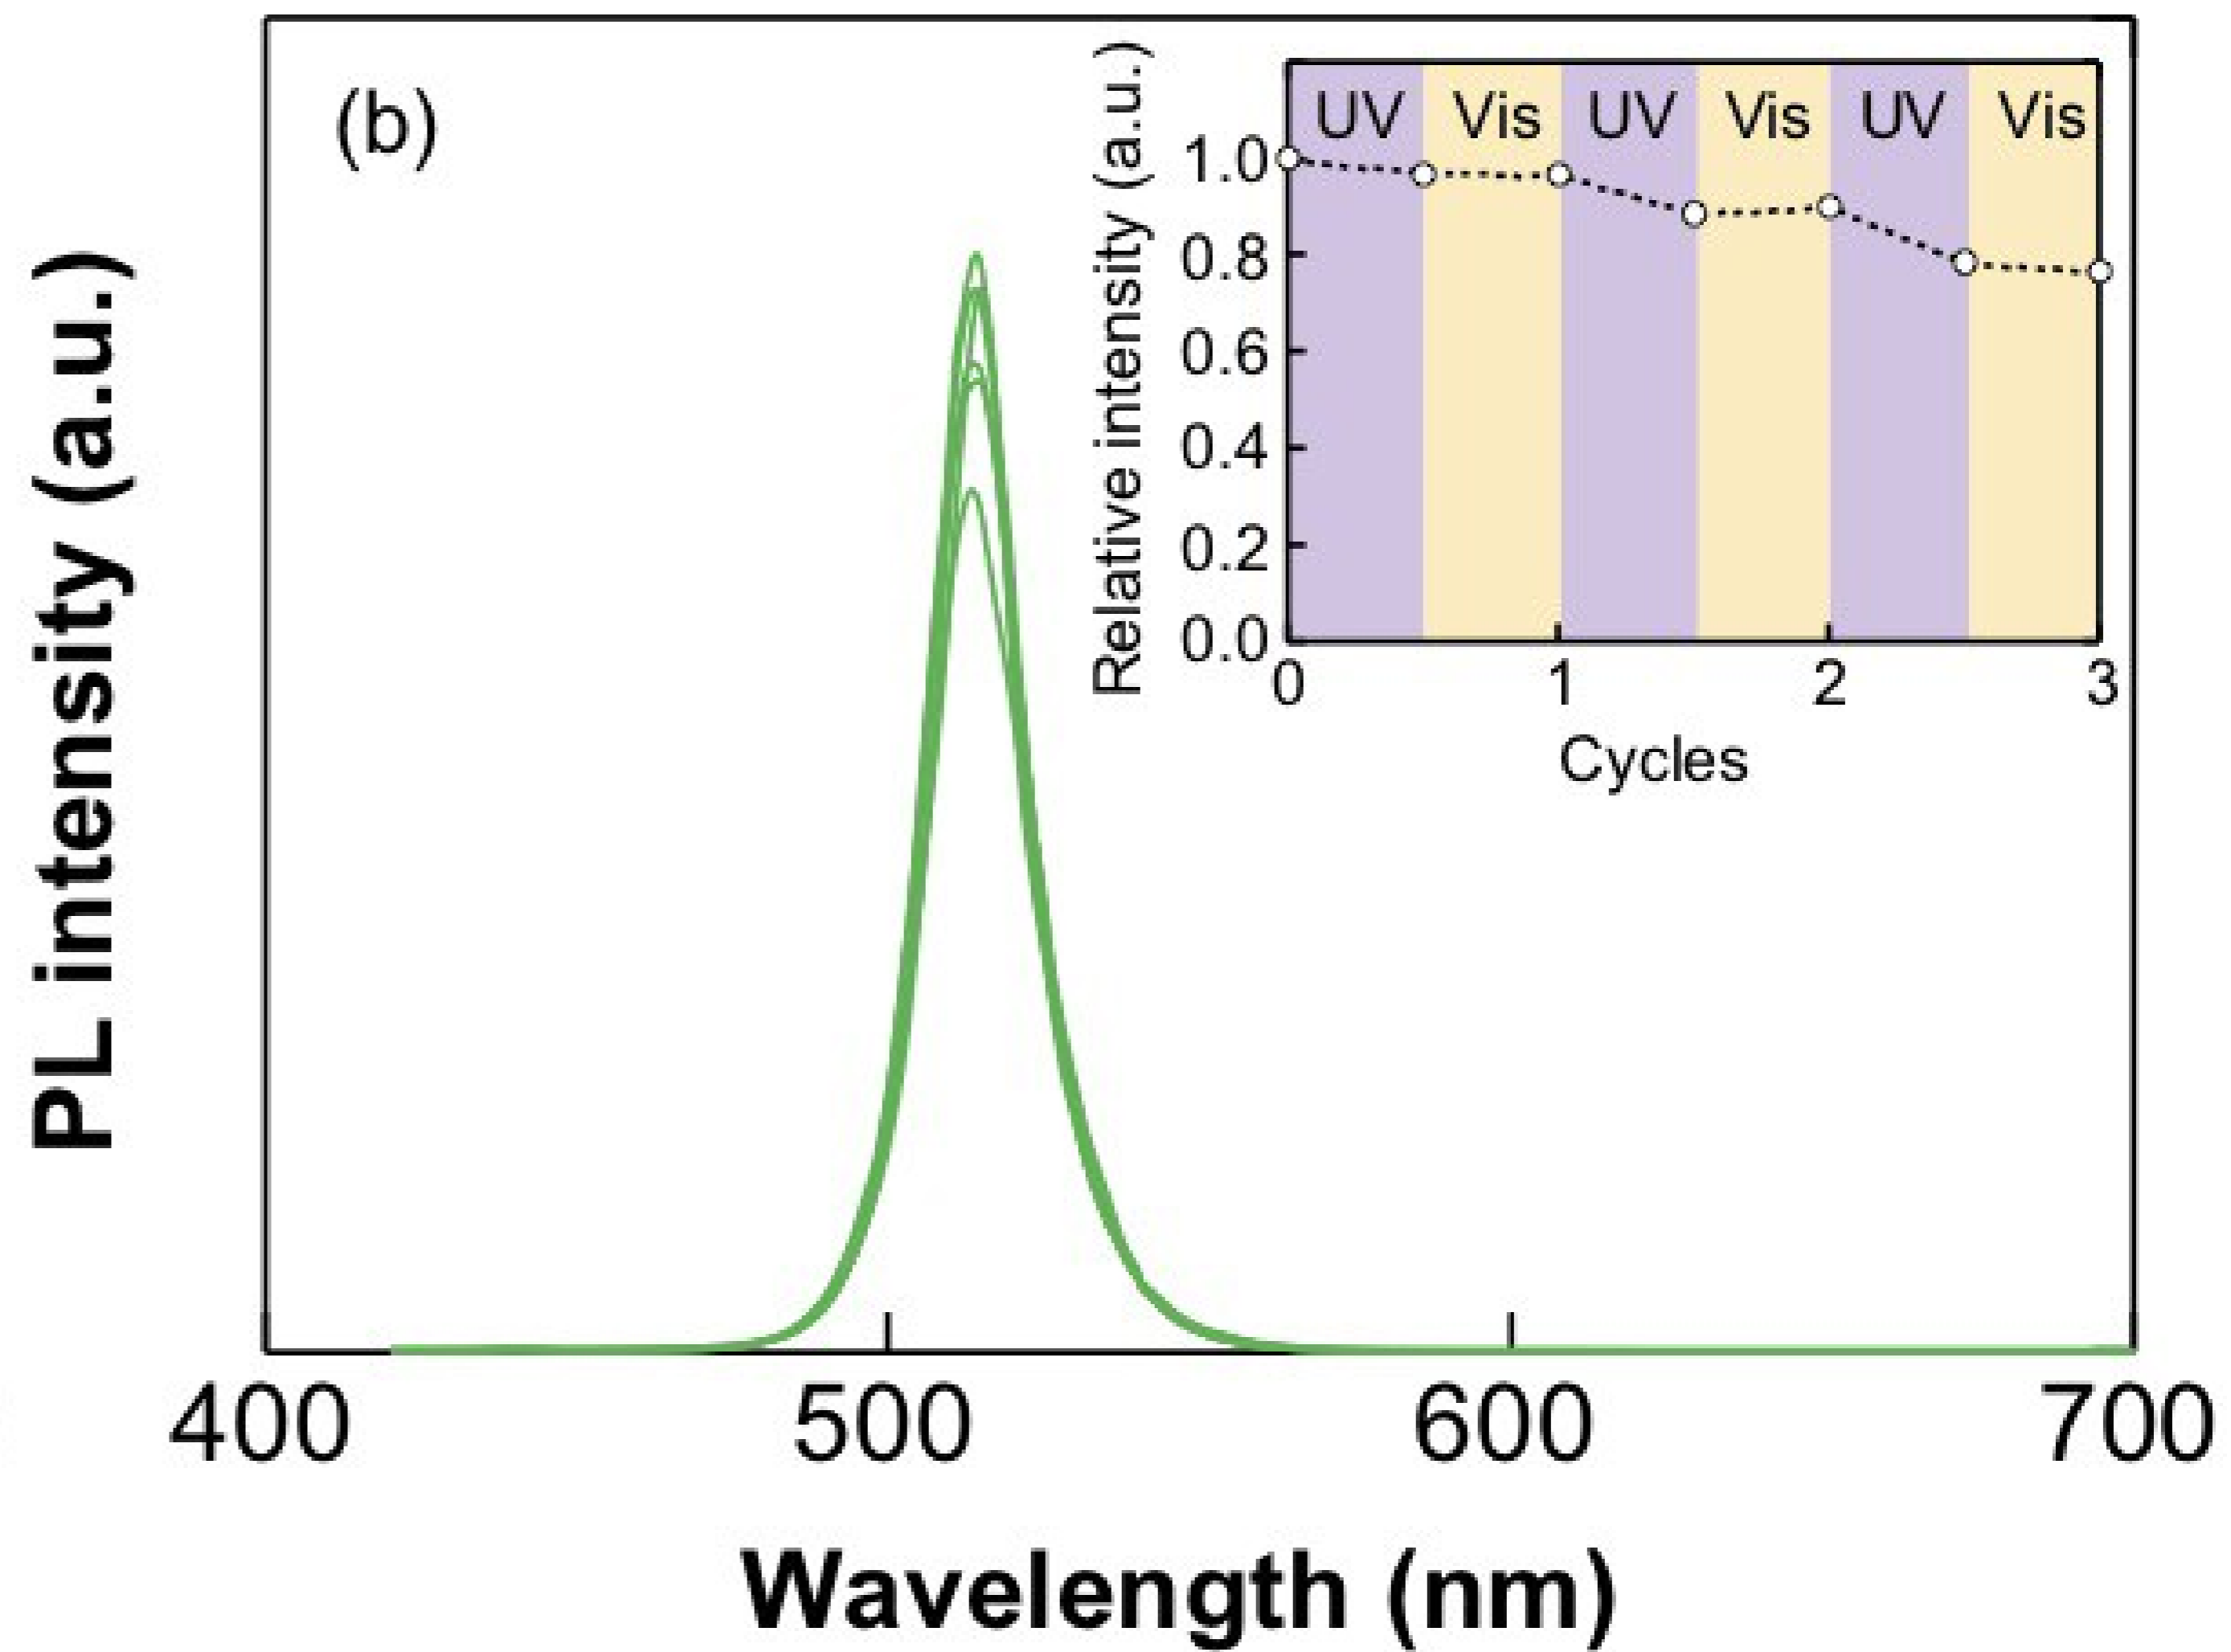

Supplement: c9cc03797g8.pdf [file c9cc03797g8.pdf]
